# Supplementary material for: Facile hydrothermal synthesis of cobaltosic sulfide nanorods for high performance supercapacitors
Source: Royal Society of Chemistry journal article supplement (doi:10.1039/d2ra01648f), 2022-01-01
Supplement: d2ra01648f1.pdf [file d2ra01648f1.pdf]

## Supporting Information

### Facile Hydrothermal Synthesis of $\text{Co}_3\text{S}_4$ Nanorods for High-performance Supercapacitors

Yin Song,<sup>a</sup> Yuanhao Ding,<sup>a</sup> Chenghua Yang,<sup>a</sup> Xiaokang Pei,<sup>a</sup> Guangxia Wang,<sup>a</sup> Dezhou Zheng,<sup>a</sup> Wei Xu,<sup>a</sup> Fuxin Wang,<sup>\*a</sup> Xihong Lu<sup>\*ab</sup>

<sup>a</sup>*School of Applied Physics and Materials, Wuyi University, Jiangmen 529020, PR China. E-mail: wangfux91@126.com; luxh6@mail.sysu.edu.cn*

<sup>b</sup>*MOE of the Key Laboratory of Bioinorganic and Synthetic Chemistry, The Key Lab of Low-carbon Chem & Energy Conservation of Guangdong Province, School of Chemistry, Sun Yat-Sen University, Guangzhou 510275, PR China*

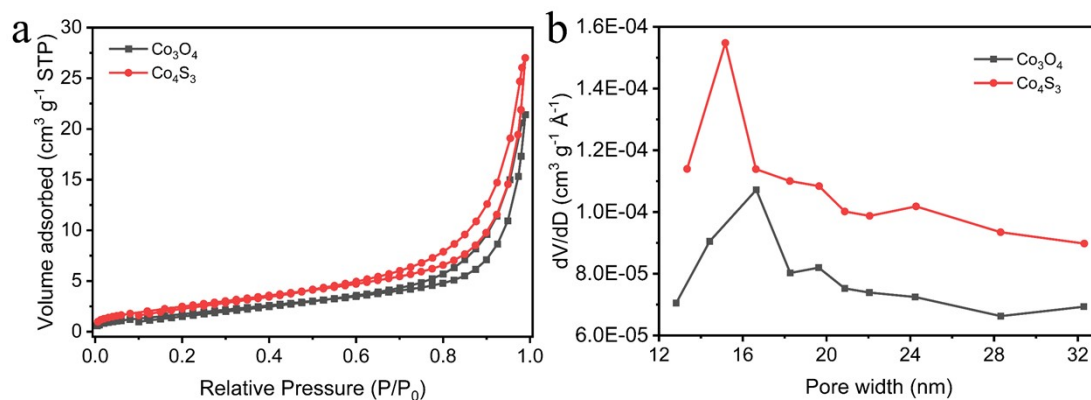

Figure S1 (a) Nitrogen adsorption–desorption isotherms of  $\text{Co}_3\text{O}_4$  and  $\text{Co}_4\text{S}_3$  sample.

(b) Pore size distribution plots of  $\text{Co}_3\text{O}_4$  and  $\text{Co}_4\text{S}_3$  sample

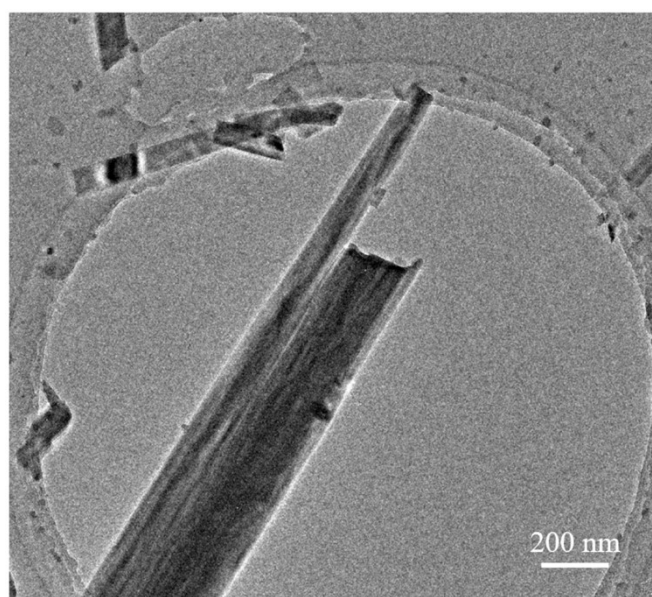

Figure S2 The TEM images of the  $\text{Co}_3\text{O}_4$  sample.

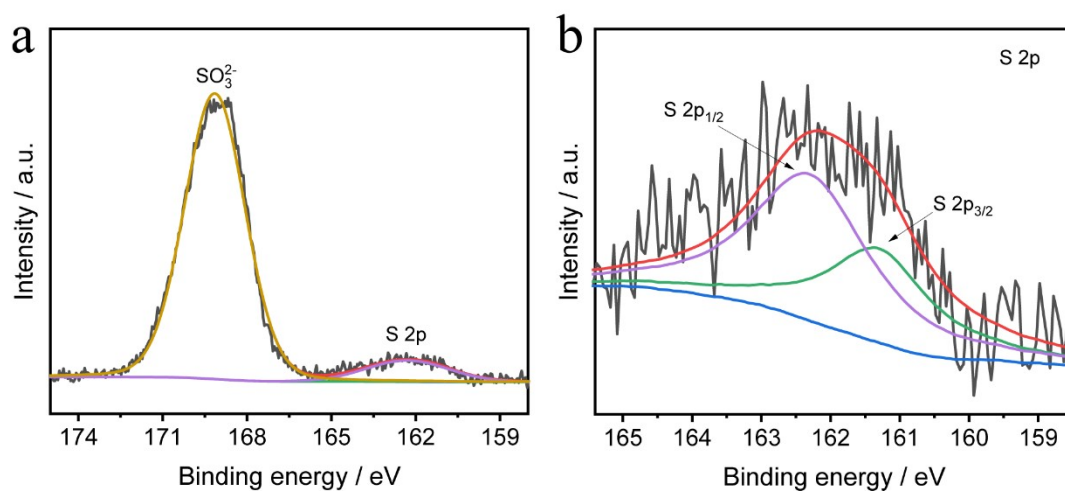

Figure S3 (a, b) S 2p spectrum of the  $\text{Co}_4\text{S}_3$  sample.

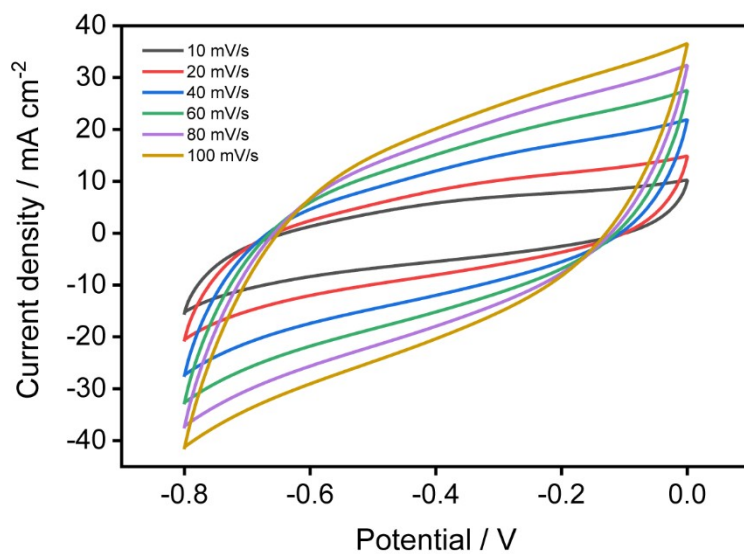

Figure S4 CVs of  $\text{Co}_4\text{S}_3$  electrode at different scan rate.

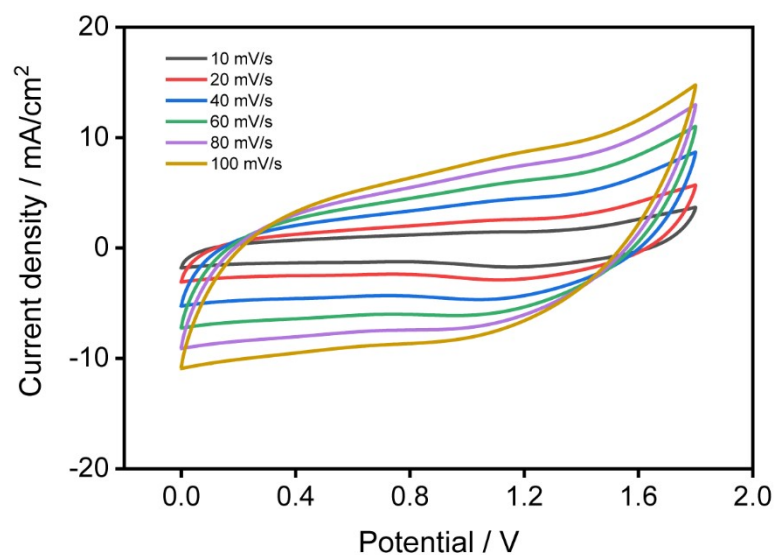

Figure S5 CVs of  $\text{MnO}_2//\text{Co}_4\text{S}_3$ -ASCs electrode at different scan rate.
